# Supplementary material for: CREG1 attenuates doxorubicin-induced cardiotoxicity by inhibiting the ferroptosis of cardiomyocytes
Source: PubMed Central journal article supplement — Redox Biol. 2024 Jul 29;75:103293. doi: 10.1016/j.redox.2024.103293 (PMC11345695; doi:10.1016/j.redox.2024.103293), 2024-07-29

**Figure1G**

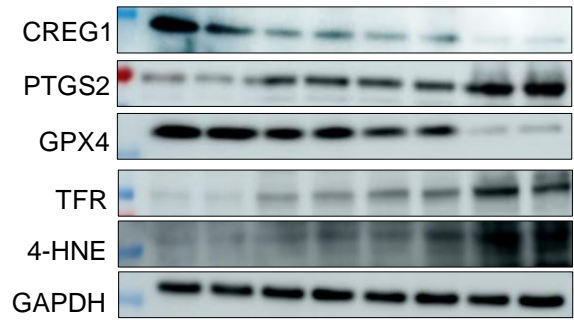

CREG1

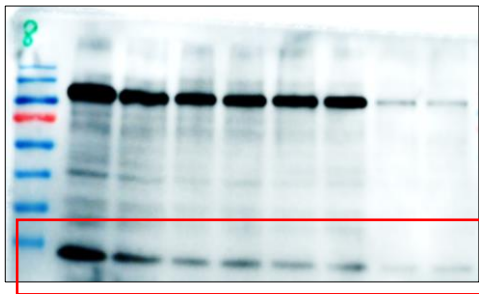

PTGS2

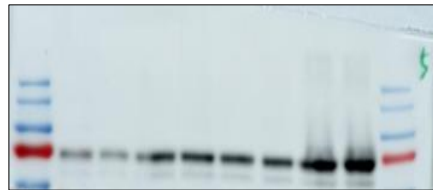

GPX4

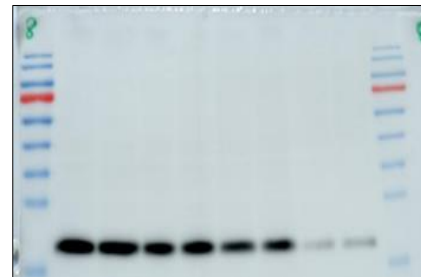

TFR

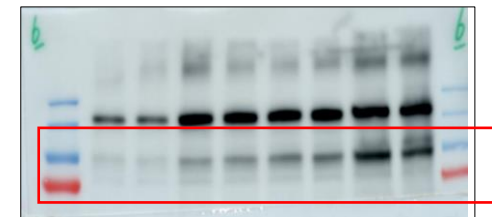

4-HNE

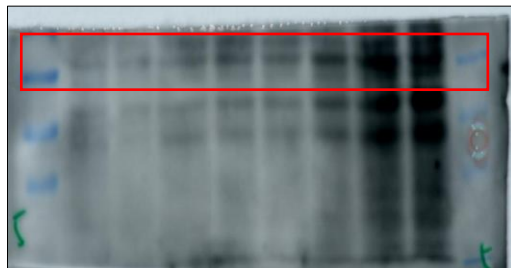

GAPDH

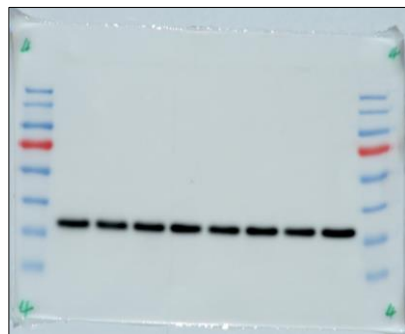

**Figure2G**

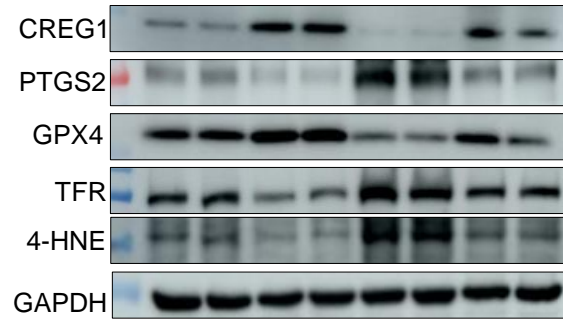

CREG1

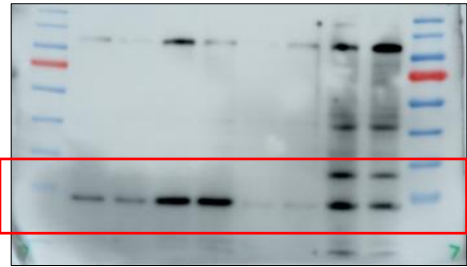

PTGS2

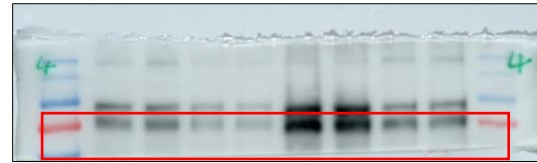

GPX4

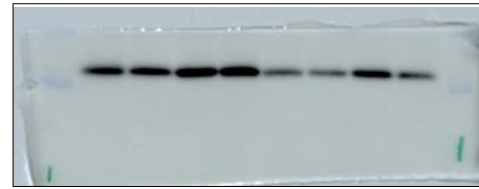

TFR

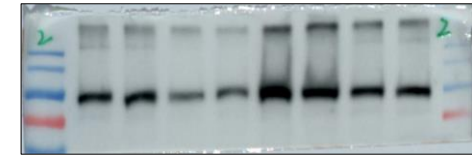

4-HNE

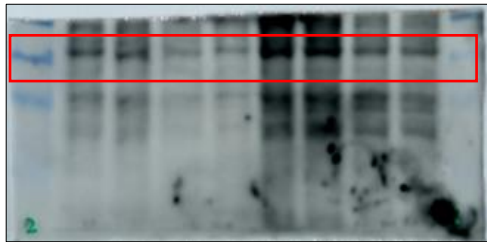

GAPDH

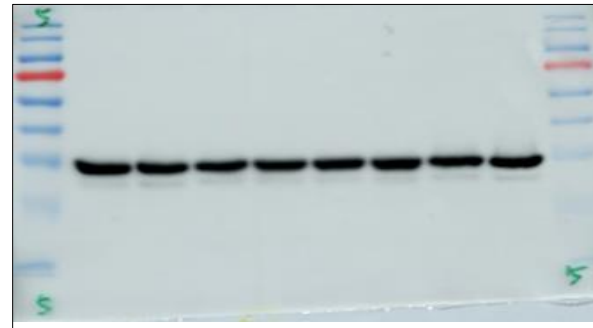

Figure3A

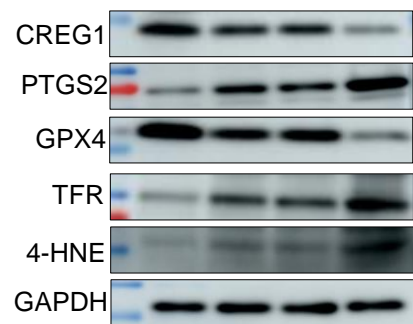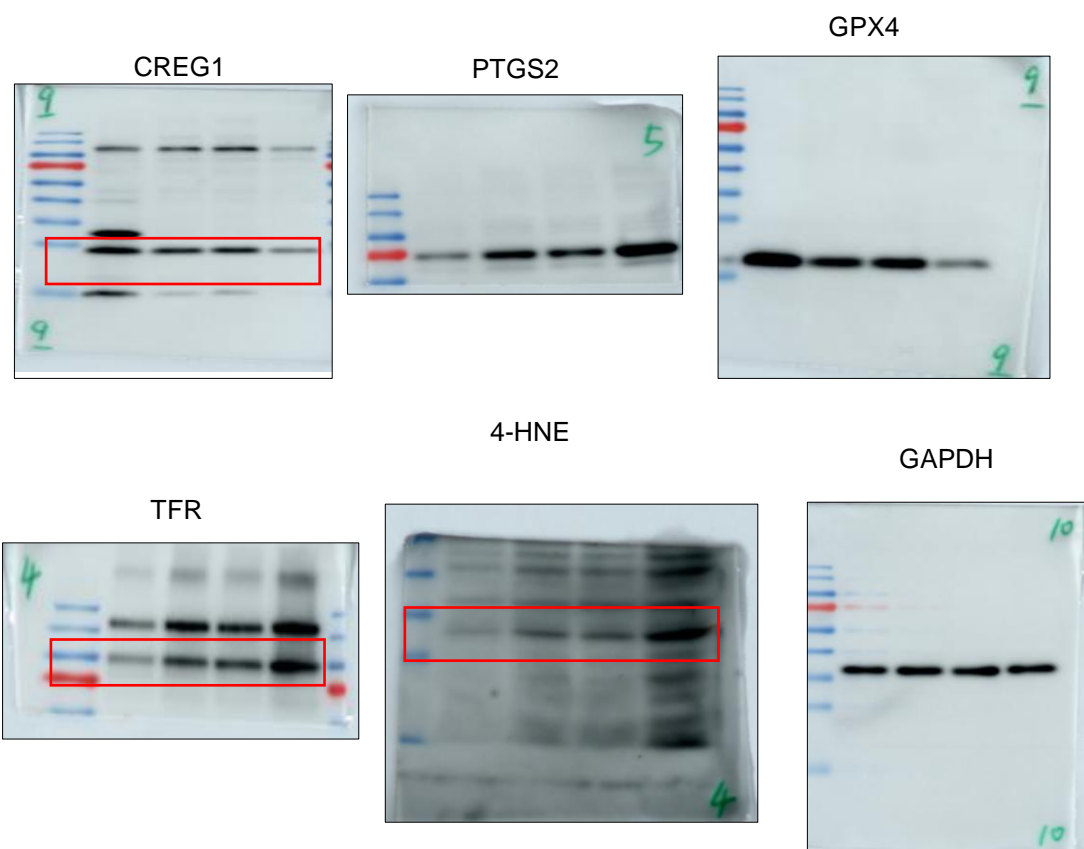

Figure4A

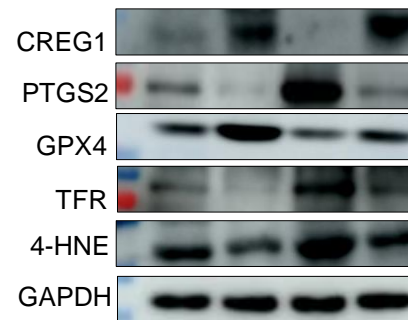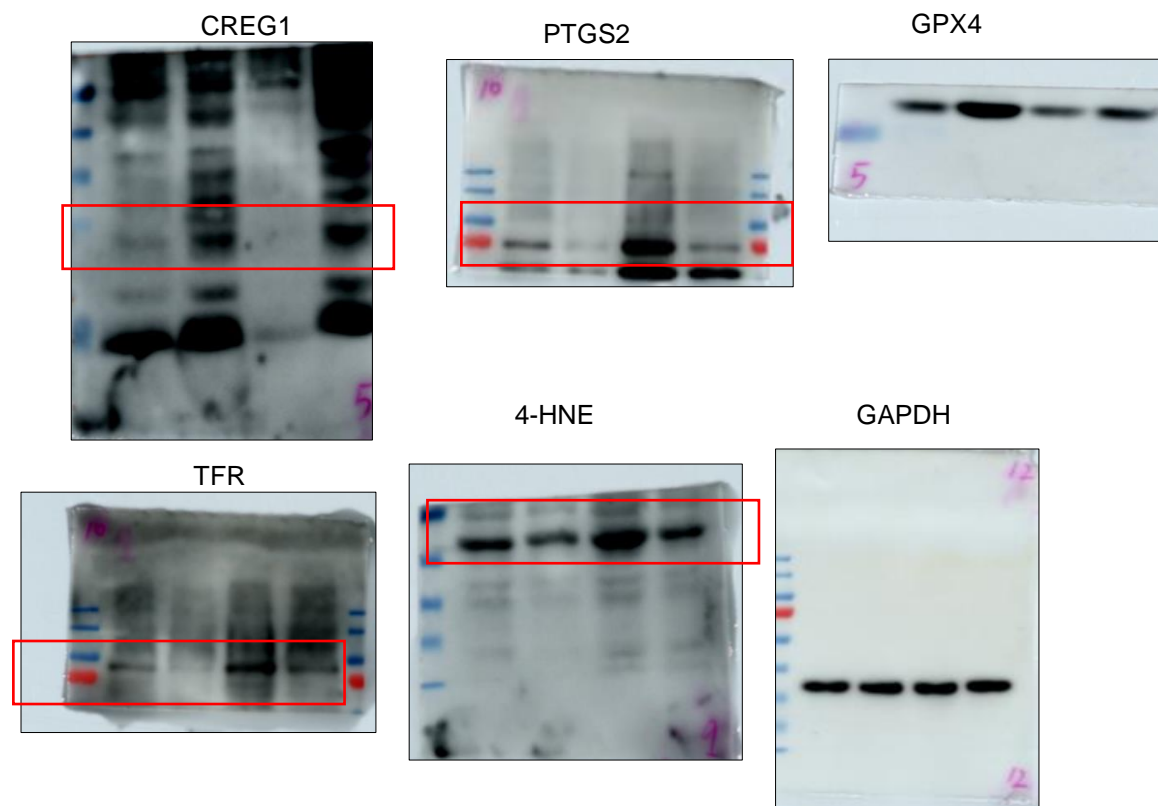

**Figure5C**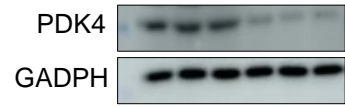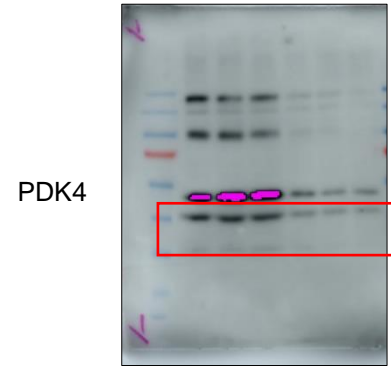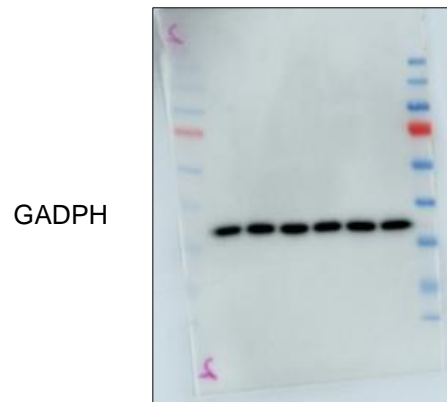**Figure5F**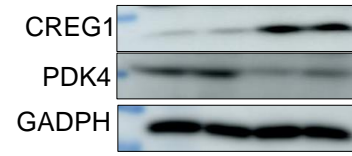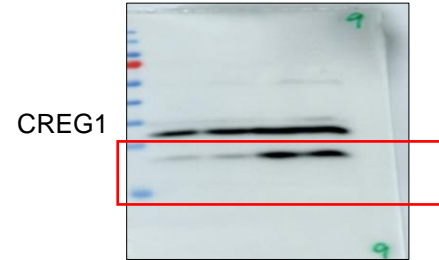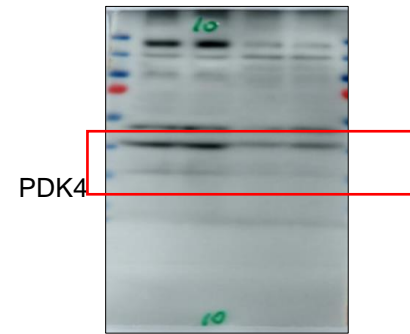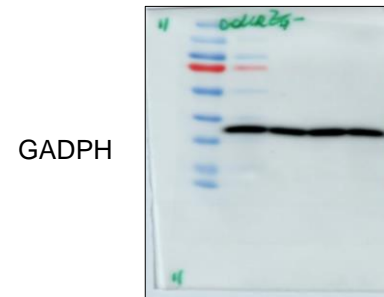**Figure5H**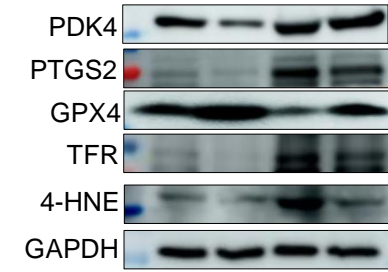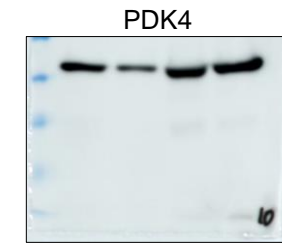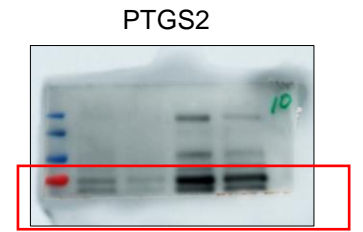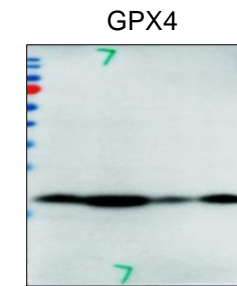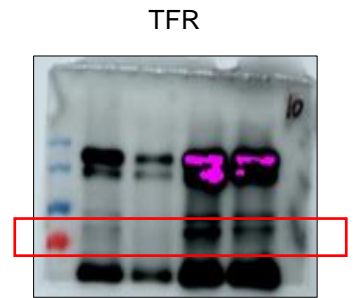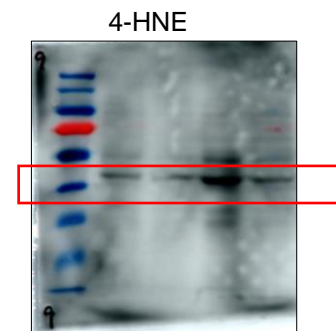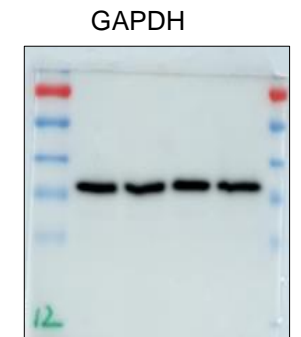

**Figure6B**

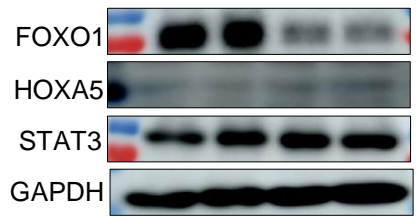

**Figure6E**

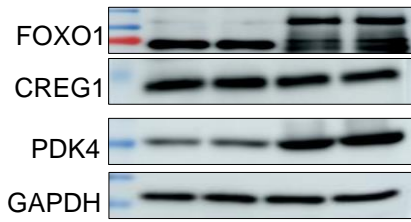

**Figure6H**

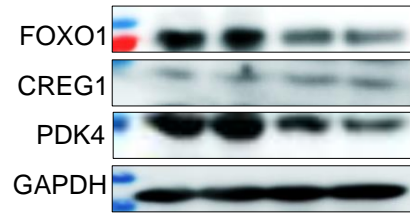

**Figure6L**

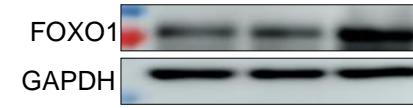

**Figure6N**

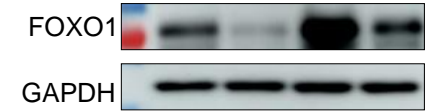

FOXO1

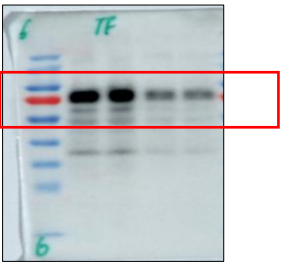

CREG1

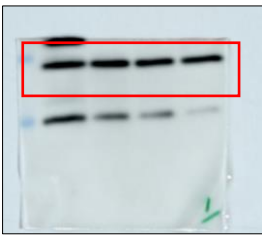

CREG1

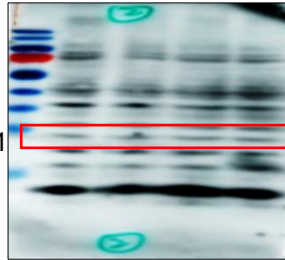

FOXO1

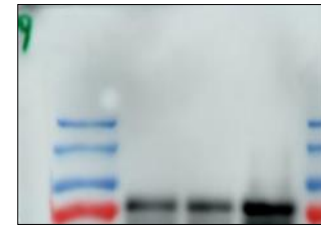

FOXO1

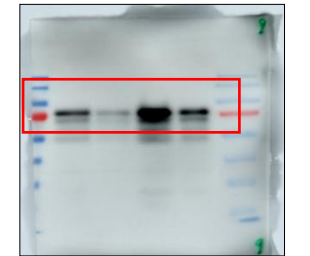

HOXA5

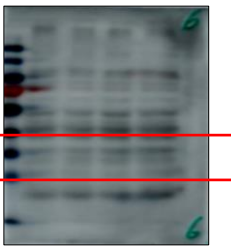

FOXO1

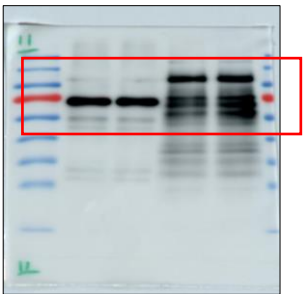

FOXO1

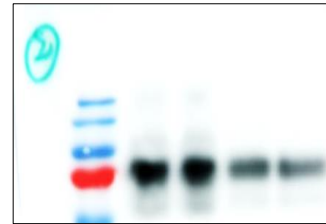

GAPDH

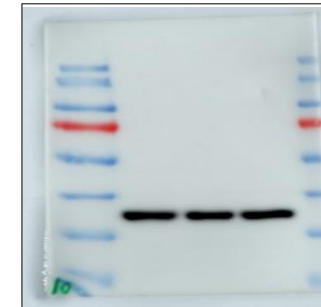

GAPDH

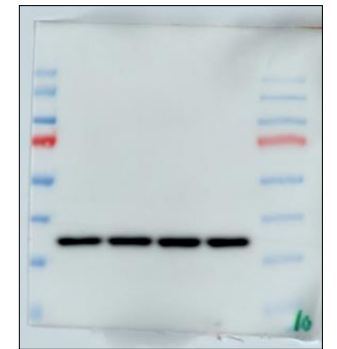

STAT3

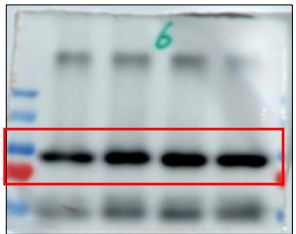

PDK4

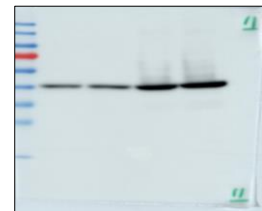

PDK4

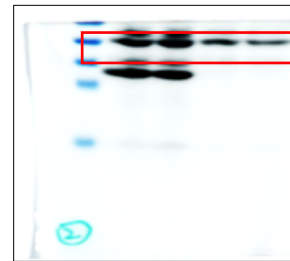

GAPDH

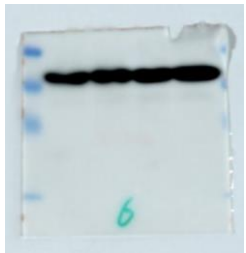

GAPDH

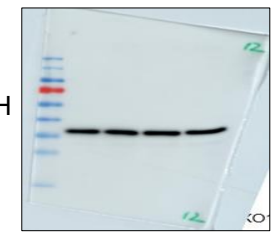

GAPDH

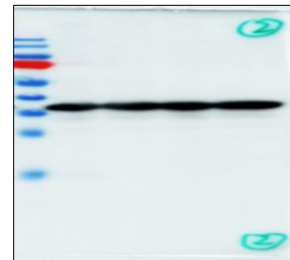

**Figure7B**

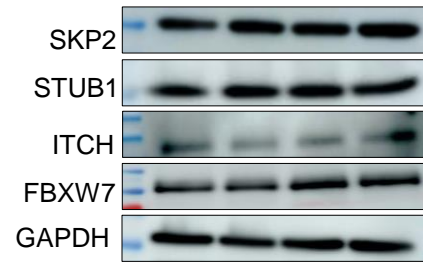

SKP2

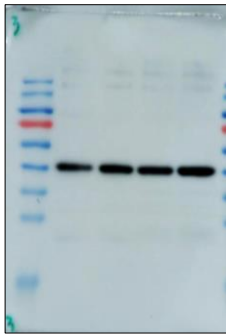

STUB1

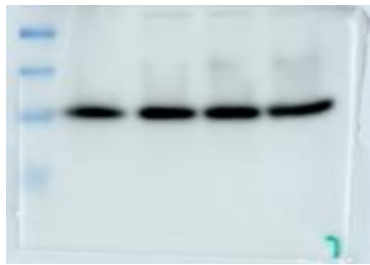

ITCH

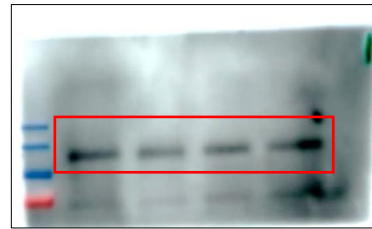

FBXW7

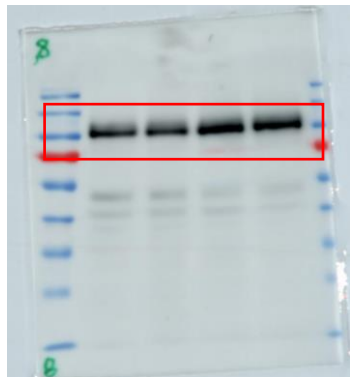

GAPDH

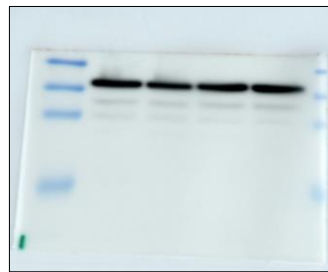

**Figure7E**

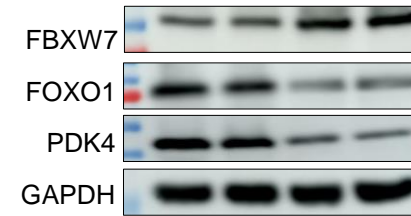

FBXW7

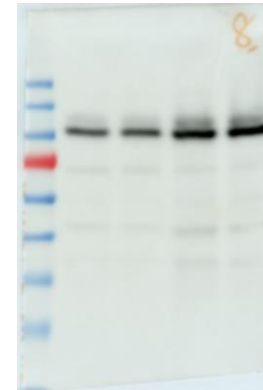

FOXO1

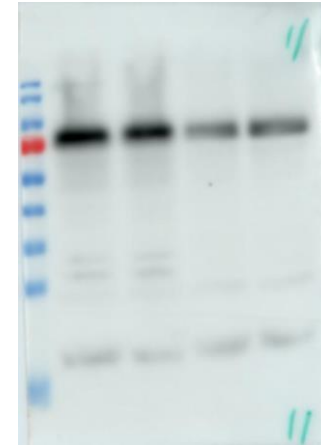

PDK4

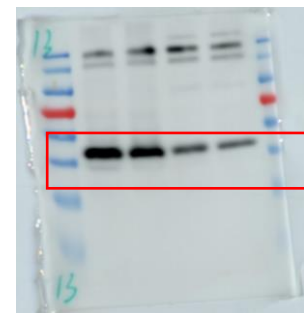

GAPDH

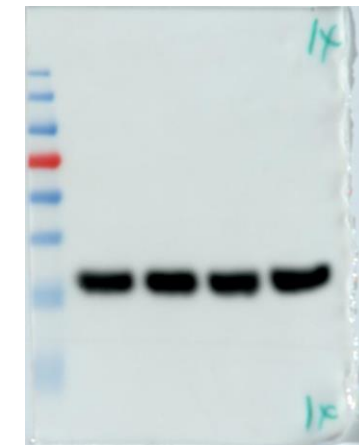

**Figure7G**

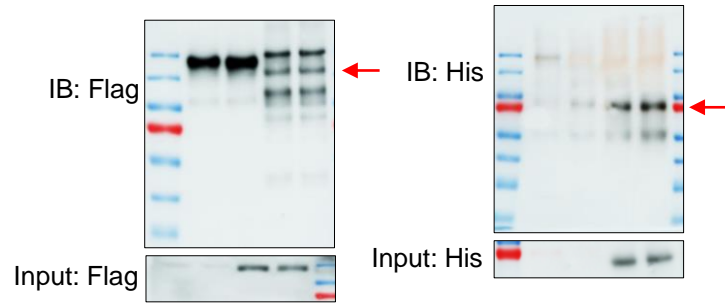

**Figure7H**

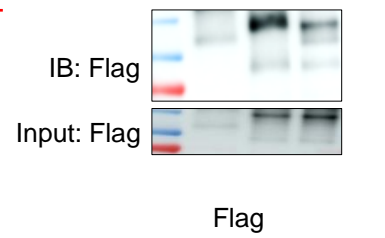

**Figure7I**

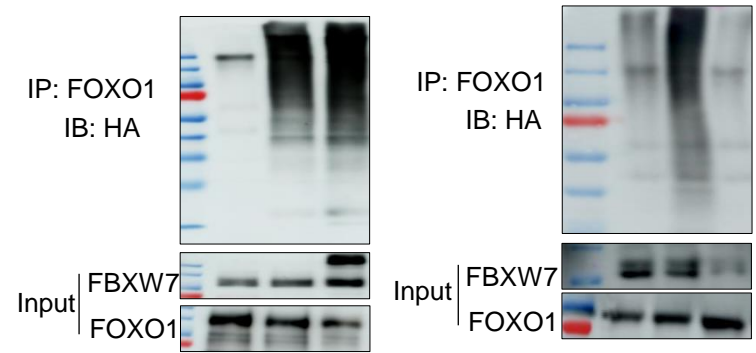

**Figure7J**

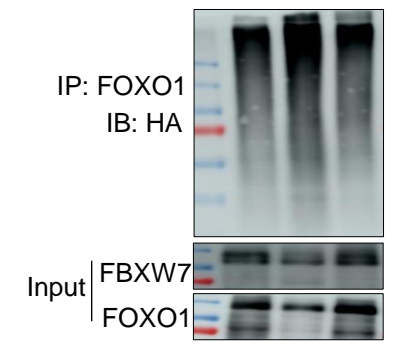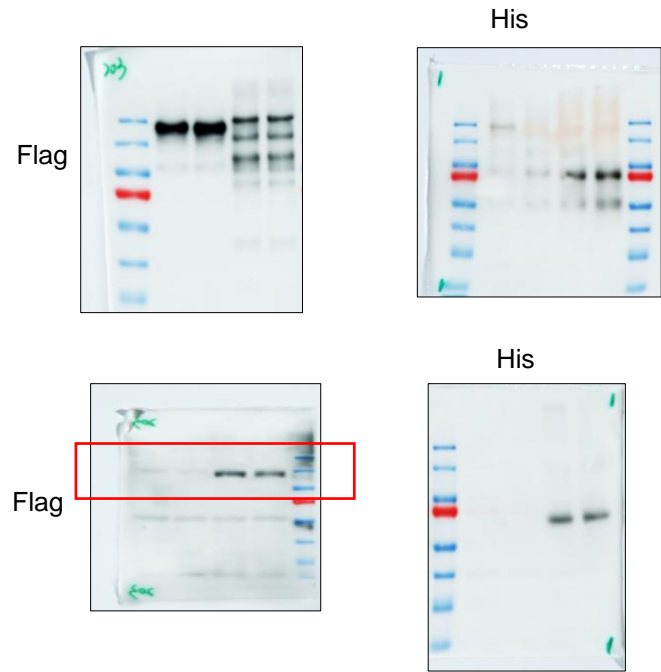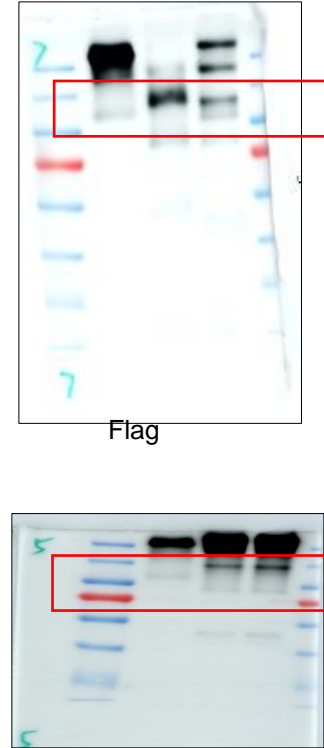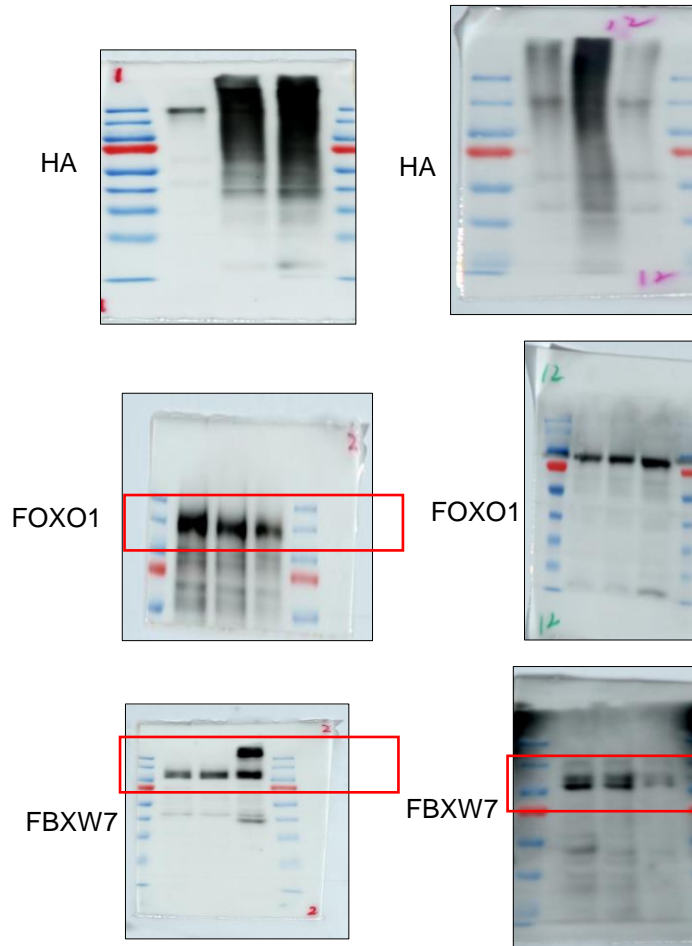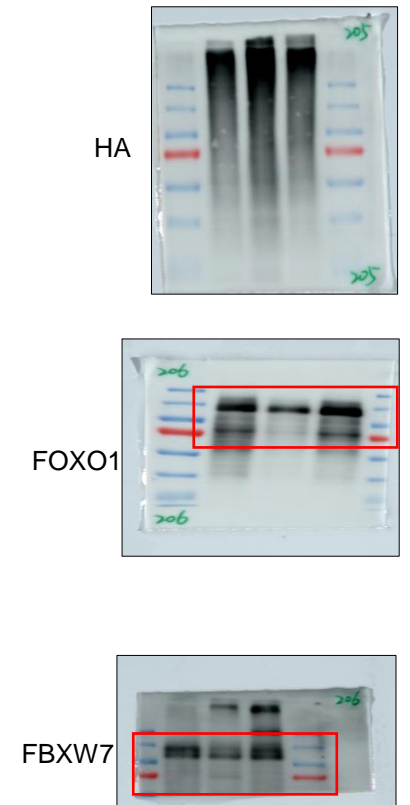

**Figure8F**

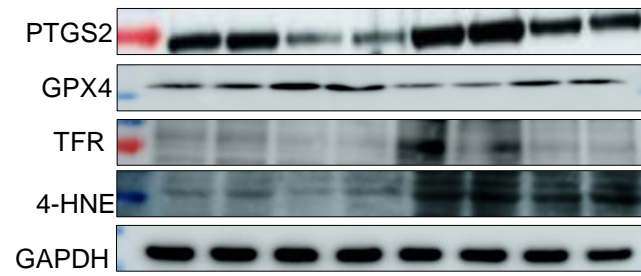

PTGS2

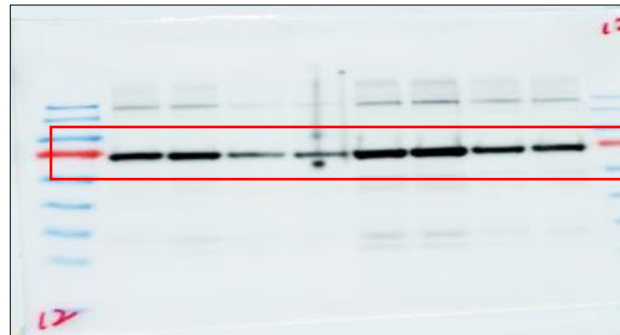

GPX4

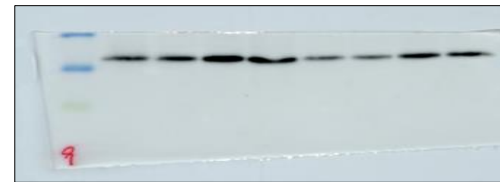

TFR

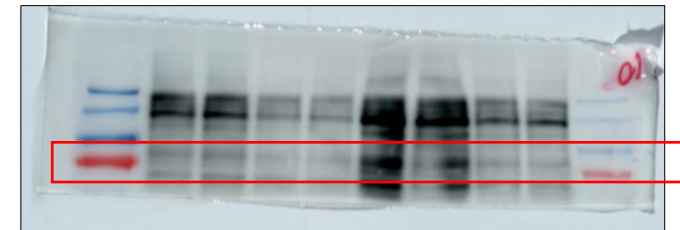

4-HNE

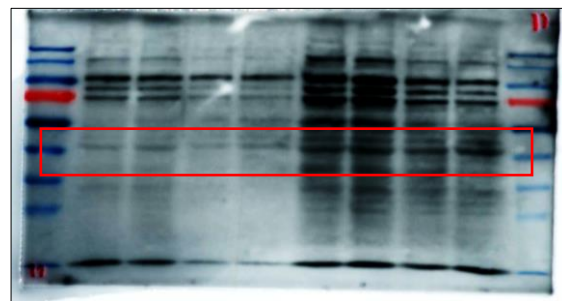

GAPDH

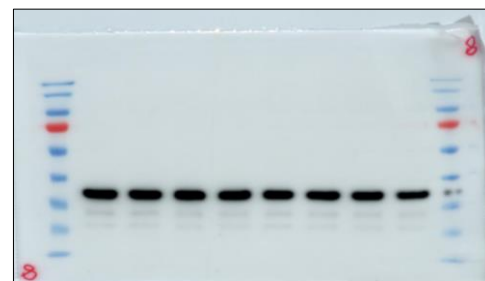



FigureS1D

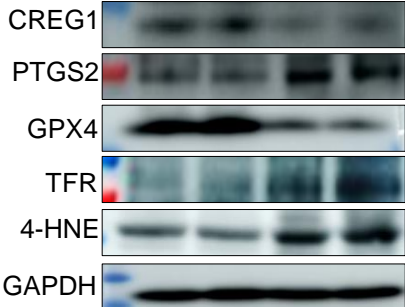

FigureS3E

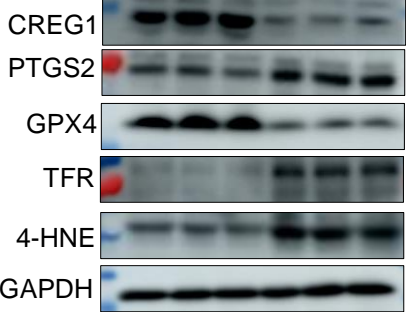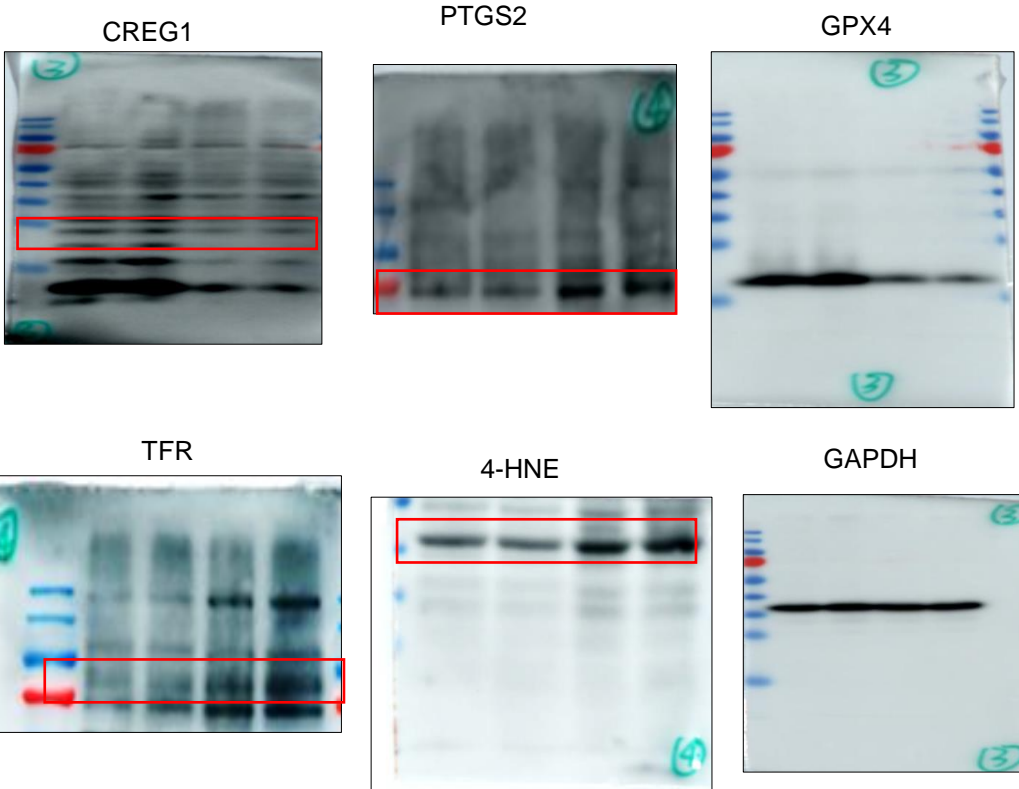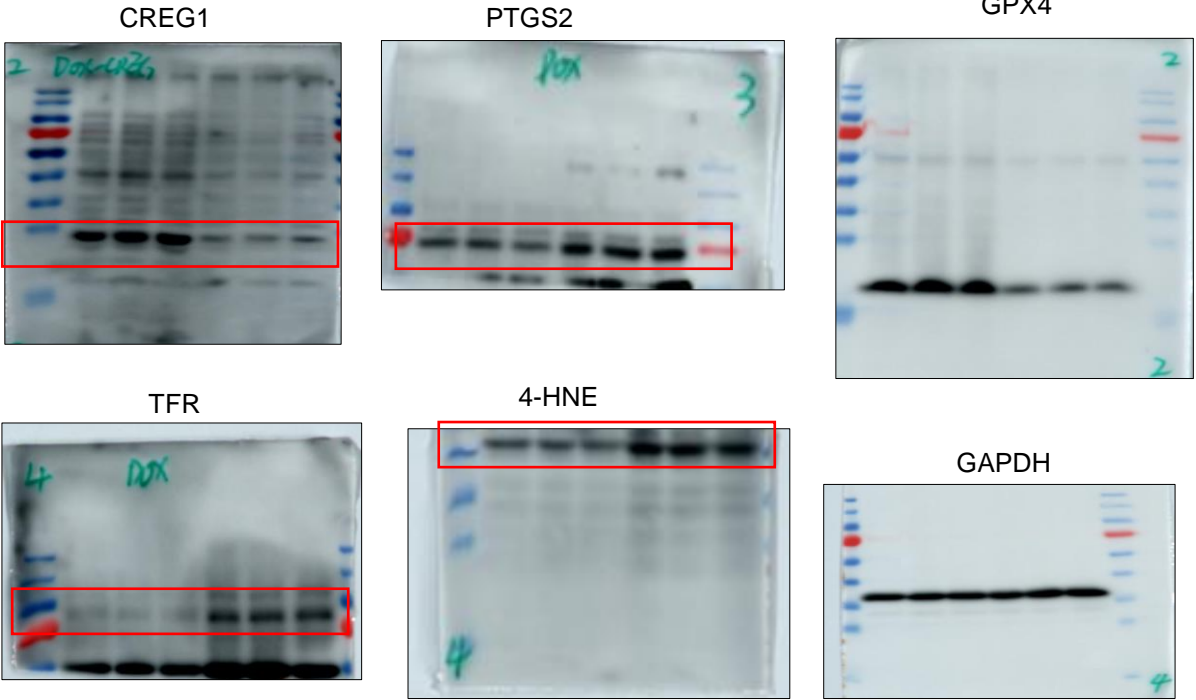

FigureS5B

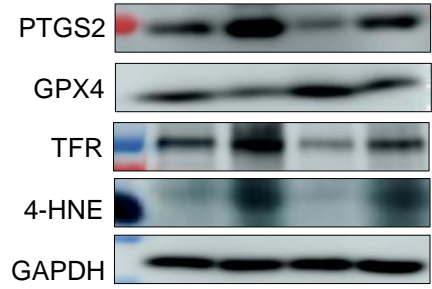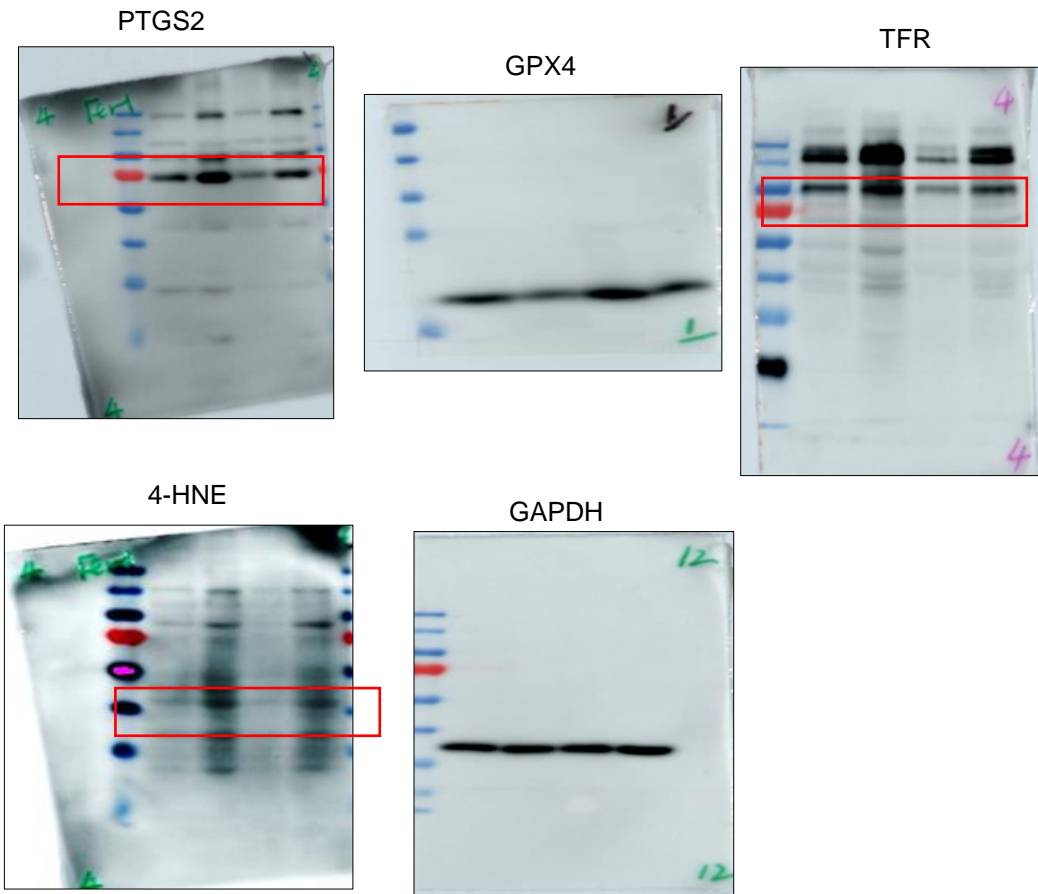

FigureS6B

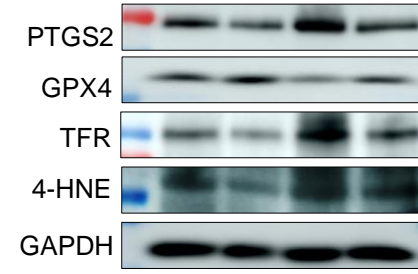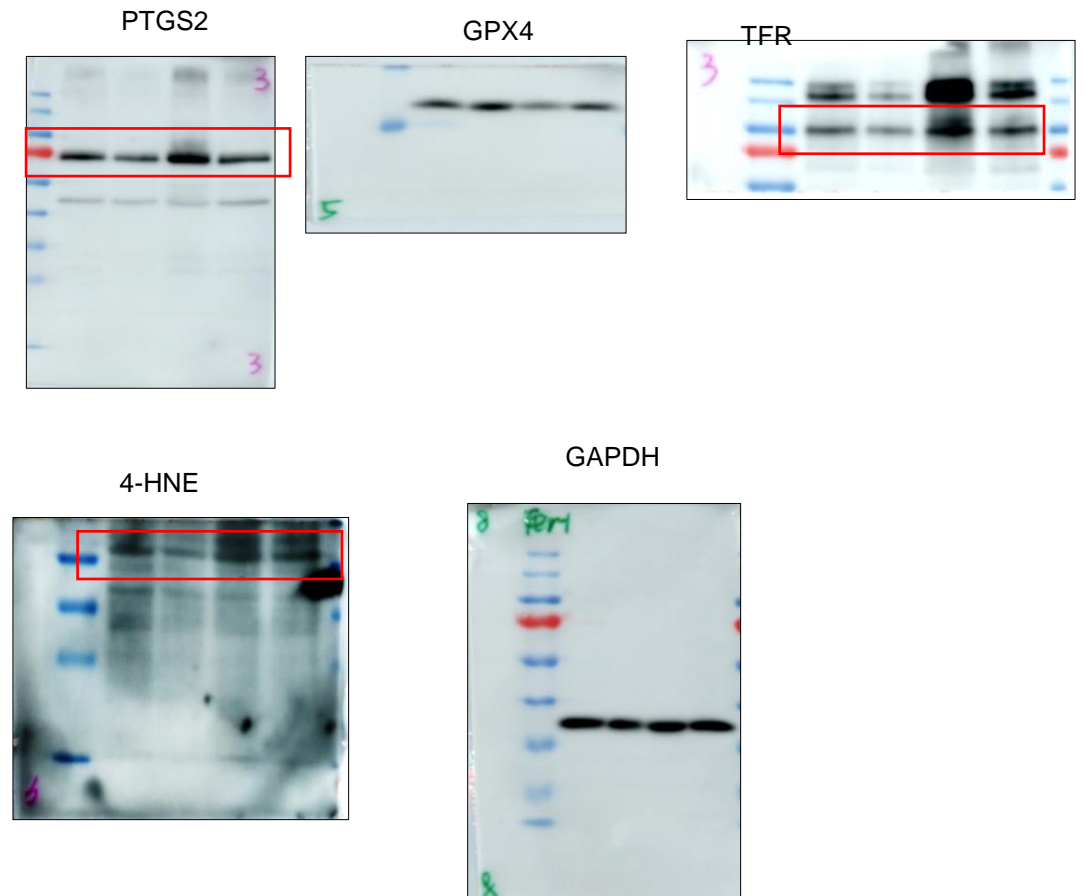

**FigureS7B**

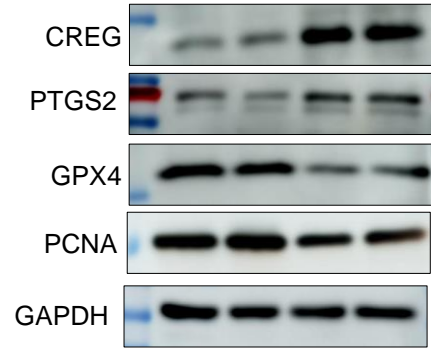

**FigureS7D**

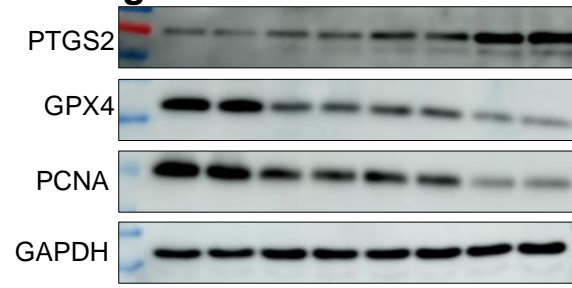

**FigureS7G**

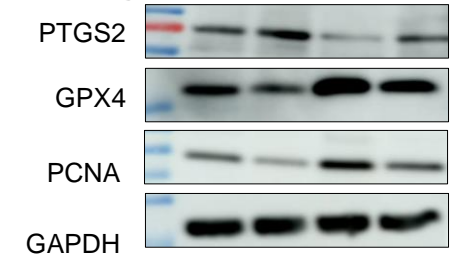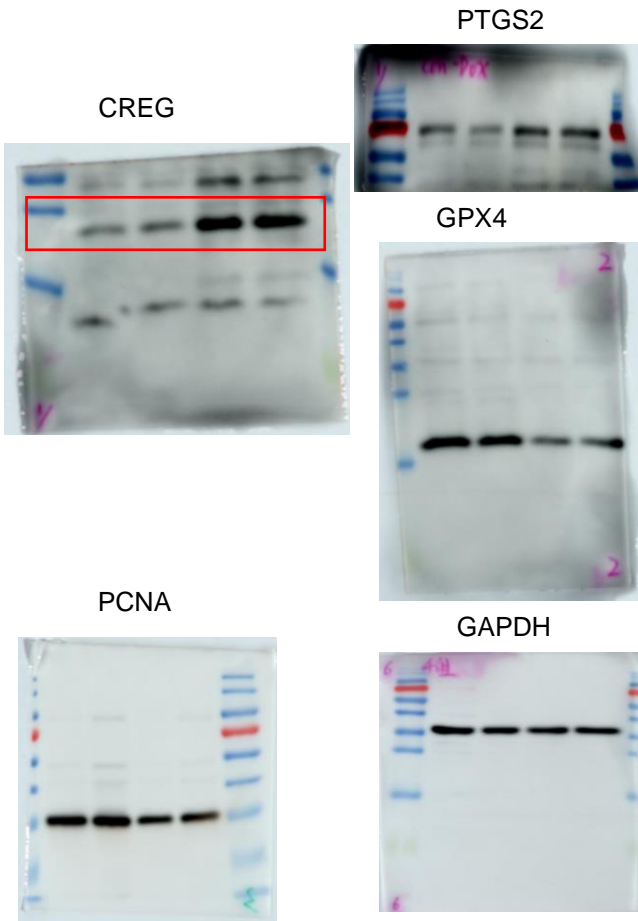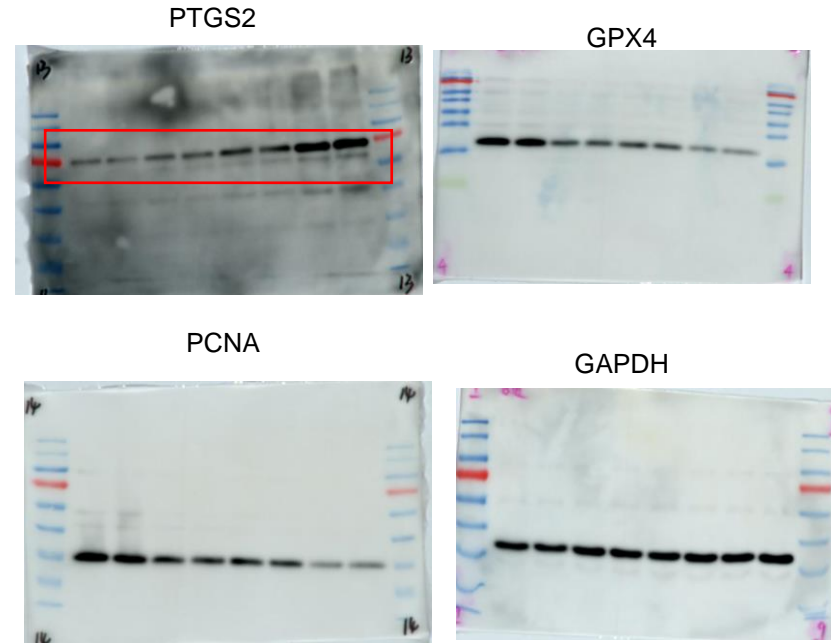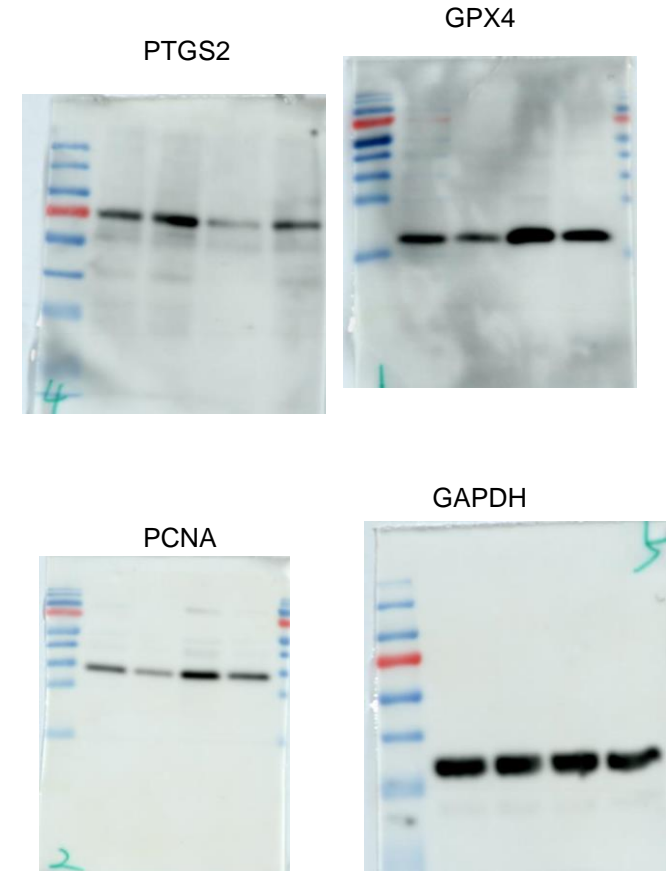

**FigureS8B**

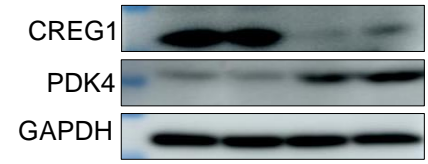

**FigureS8E**

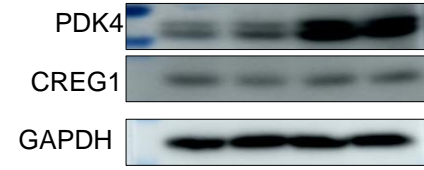

**FigureS8H**

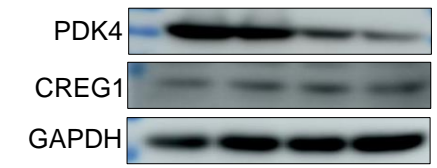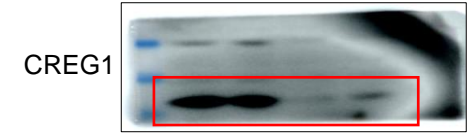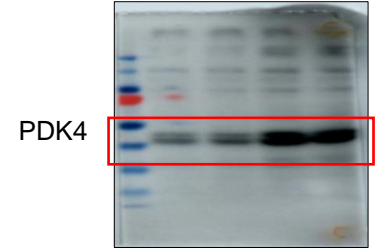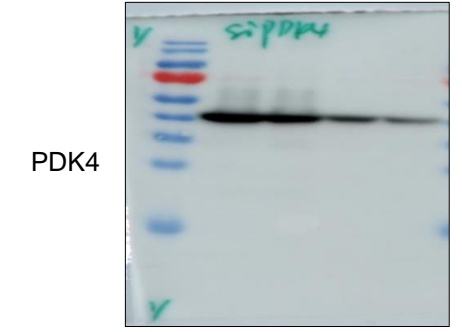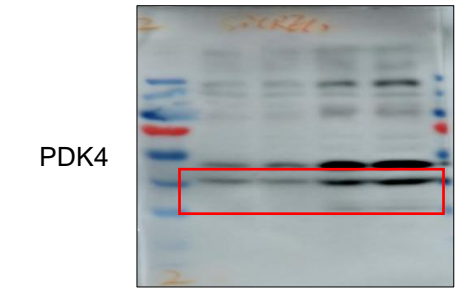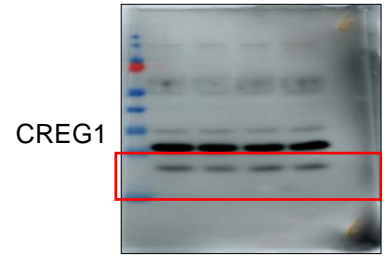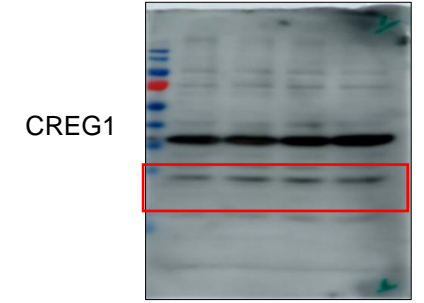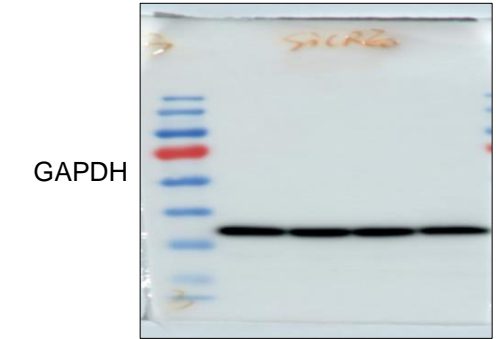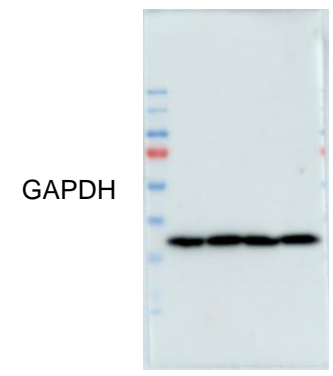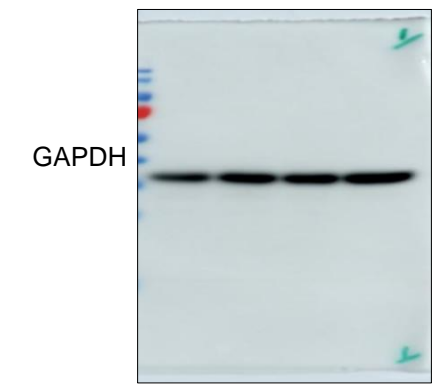

**FigureS8J**

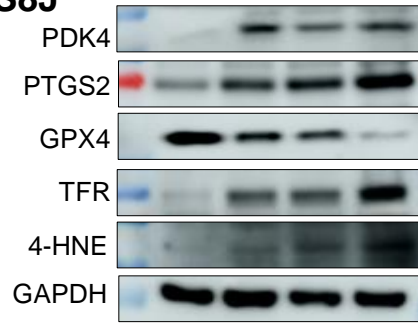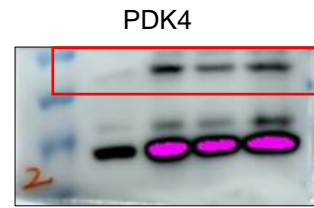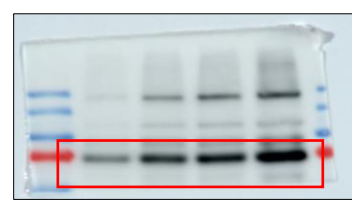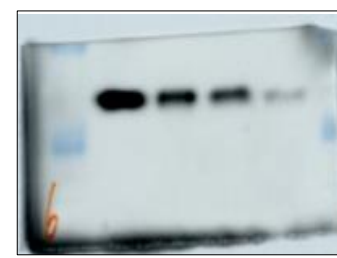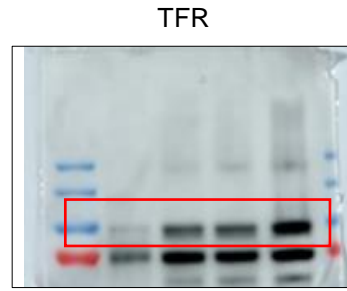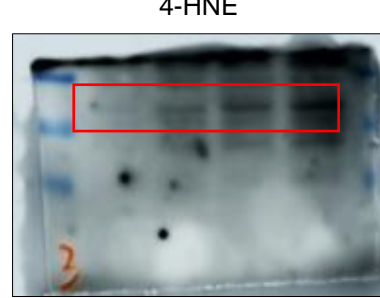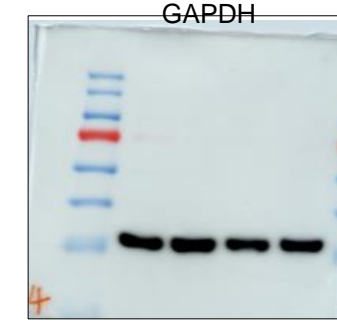

**FigureS8L**

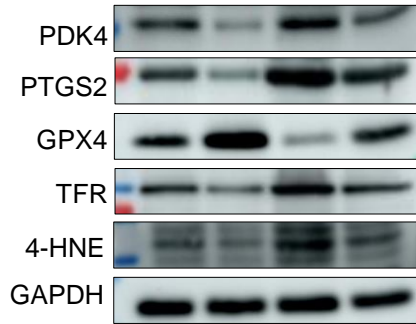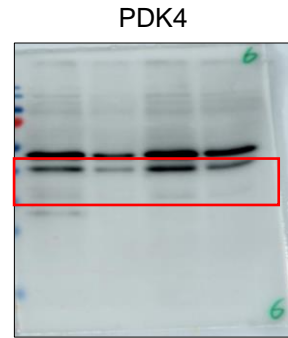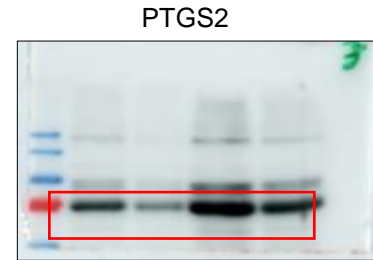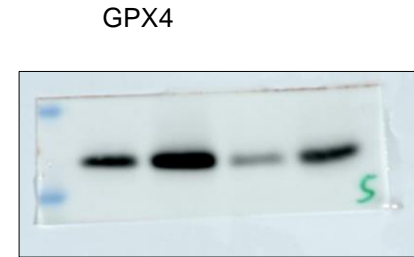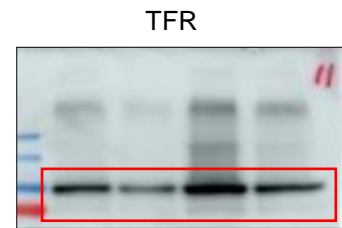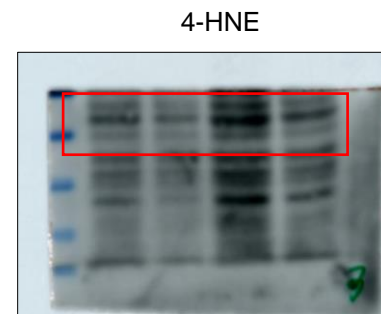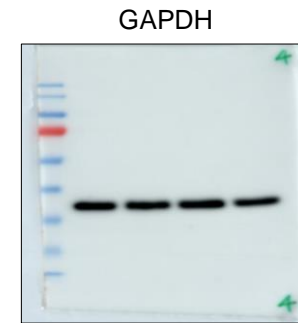

**FigureS9C**

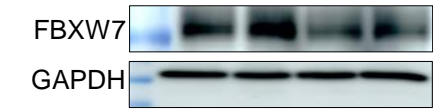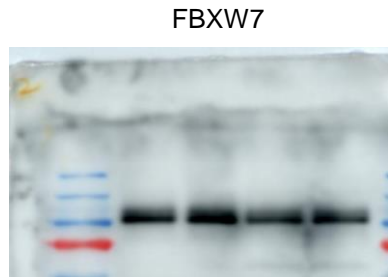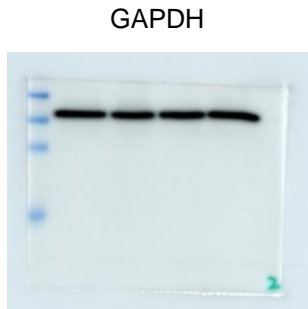

**FigureS9F**

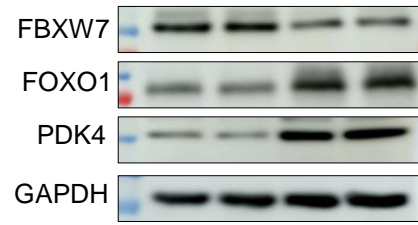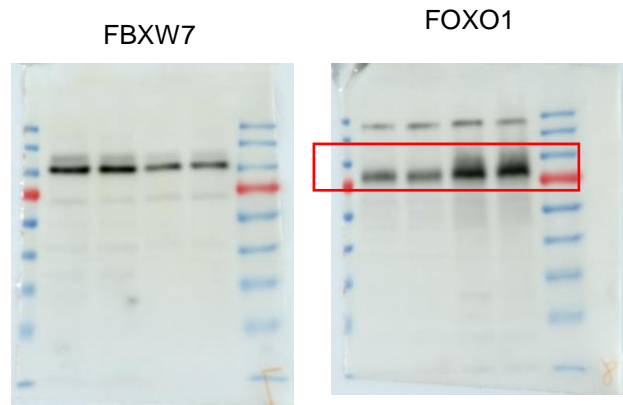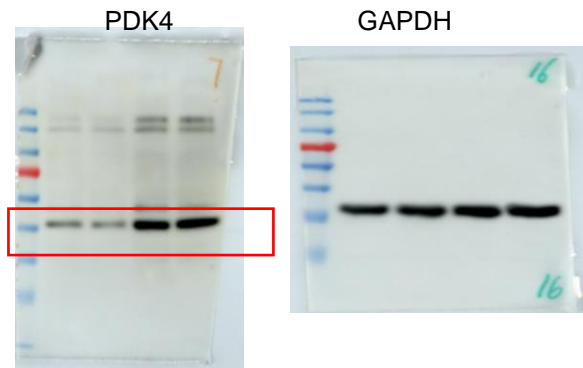

**FigureS9H**

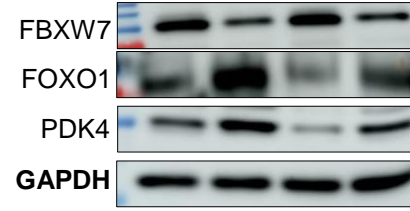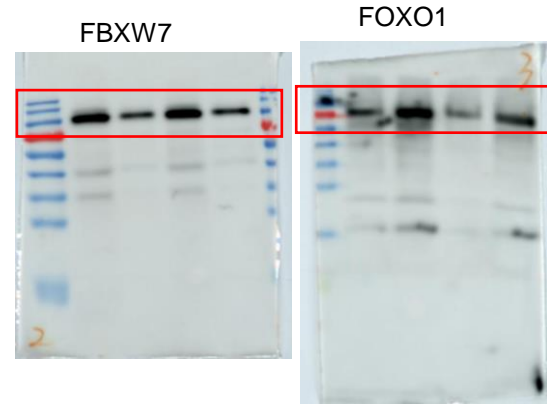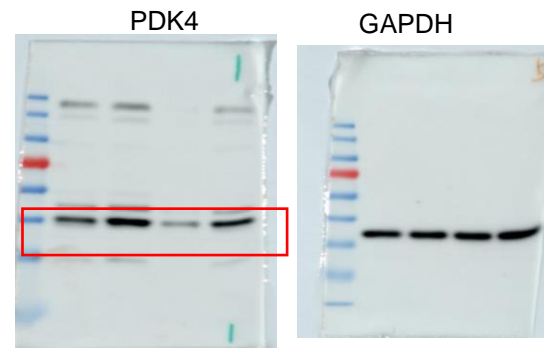

**FigureS9J**

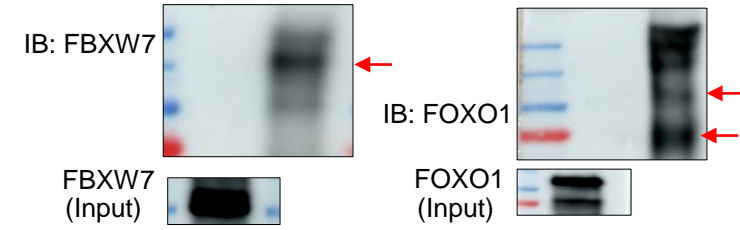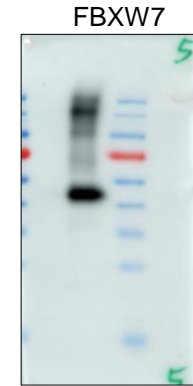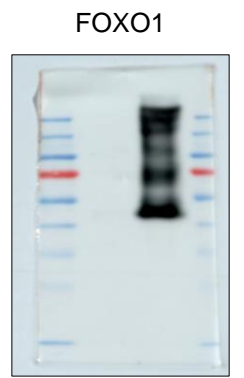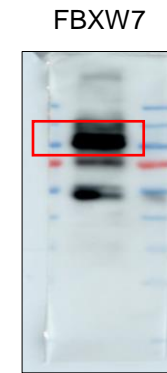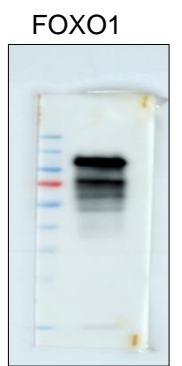

**Figure10SA**

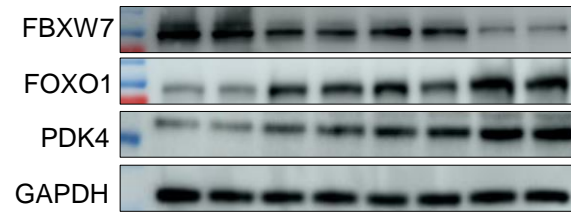

FBXW7

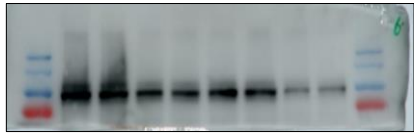

FOXO1

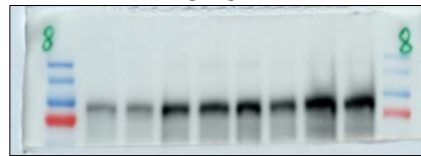

PDK4

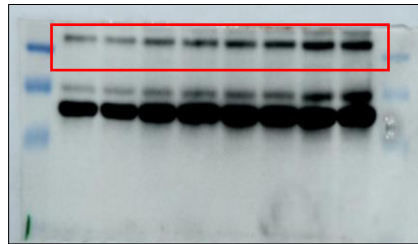

GAPDH

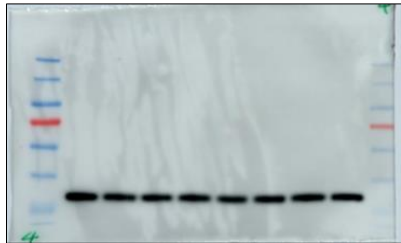

**FigureS10C**

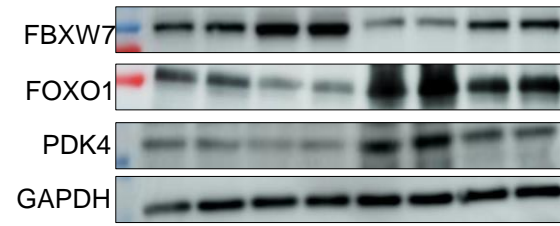

FBXW7

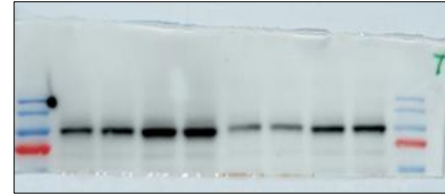

FOXO1

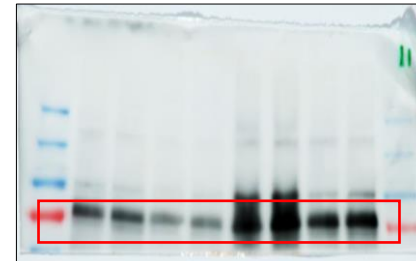

PDK4

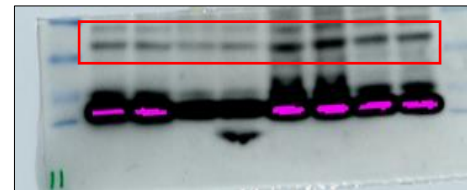

GAPDH

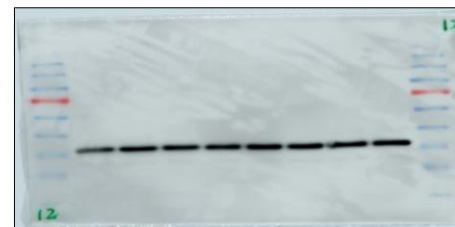

**FigureS10G**

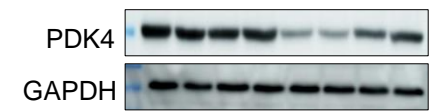

PDK4

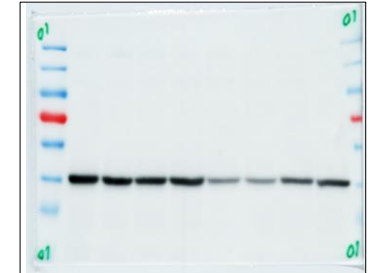

GAPDH

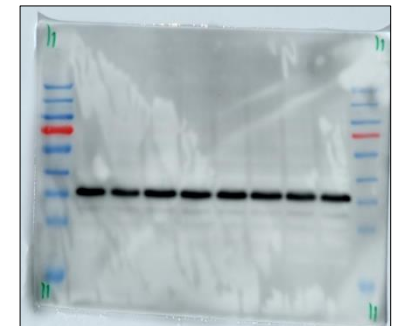

Supplement: mmc2.pdf [file mmc2.pdf]
